# Supplementary material for: Modular Multi-Rotors: From Quadrotors to Fully-Actuated Aerial Vehicles
Source: Research Square preprint supplement (doi:10.21203/rs.3.rs-4746363/v1), 2024-08-12
Supplement: Supplementary file 1 [file feb9013858ddd0bb73ac6bb4.pdf]

# **Modular Multi-Rotors: From Quadrotors to Fully-Actuated Aerial Vehicles**

## **Supplementary Materials**

Jiawei Xu<sup>1\*</sup>, Diego S. D'Antonio<sup>1</sup> and David Saldaña<sup>1</sup>

<sup>1\*</sup>Computer Science and Engineering, Autonomous and Intelligent  
Robotics Laboratory (AIRLab), Lehigh University, 113 Research Drive,  
Bethlehem, 18015, PA, USA.

\*Corresponding author(s). E-mail(s): [jix519@lehigh.edu](mailto:jix519@lehigh.edu);  
Contributing authors: [diego.s.dantonio@lehigh.edu](mailto:diego.s.dantonio@lehigh.edu); [saldana@lehigh.edu](mailto:saldana@lehigh.edu);

## 1 Proof: $T$ -Modules are torque-balanced

$$\sum_{j=1}^4 \mathbf{p}_j \times {}^M\mathbf{R}_j \hat{\mathbf{z}} = \mathbf{0}, \quad (1)$$

$$\sum_{j=1}^4 {}^M\mathbf{R}_j (-1)^j \hat{\mathbf{z}} = \mathbf{0}, \quad (2)$$

$$\sum_{j=1}^4 {}^M\mathbf{R}_j \hat{\mathbf{z}} = \lambda \mathbf{R}^* \hat{\mathbf{z}}. \quad (3)$$

**Proposition 1.** *If a module is a  $T$ -module, defined by the tilt angle  $\eta$ , the module is a torque-balanced module.*

*Proof.* By the definition of a  $T$ -module, the tilted rotors are in the axis-angle representation, where  $\hat{\mathbf{p}}_j = \frac{\mathbf{p}_j}{\|\mathbf{p}_j\|}$  is the axis of rotation and  $\eta_j$  is the angle that satisfies  $\eta_1 = -\eta_2 = \eta_3 = -\eta_4 = \eta$ . We apply Rodrigues' rotation formula to obtain the rotation matrix  ${}^M\mathbf{R}_j = \mathbf{I}_3 + (\sin \eta_j) \mathbf{P}_j + (1 - \cos \eta_j) \mathbf{P}_j^2$  from the axis-angle pair  $\hat{\mathbf{p}}_j, \eta_j$ , where  $\mathbf{P}_j = (\hat{\mathbf{p}}_j)^\times$ . Since a module has a square configuration, we assume  $\mathbf{p}_1 = [a, a, 0]^\top$ ,  $\mathbf{p}_2 = [a, -a, 0]^\top$ ,  $\mathbf{p}_3 = [-a, -a, 0]^\top$ , and  $\mathbf{p}_4 = [-a, a, 0]^\top$ . Replacing  ${}^M\mathbf{R}_j$  in terms of  $\eta$  and  $a$ , the left-hand side of (1) simplifies to  $2 \sin \eta (\mathbf{P}_1^2 - \mathbf{P}_2^2) \hat{\mathbf{z}} = \mathbf{0}$ . Similarly, we simplify the left-hand side of (2) to  $2(1 - \cos \eta)(\mathbf{P}_2^2 - \mathbf{P}_1^2) \hat{\mathbf{z}} = \mathbf{0}$ . Replacing  ${}^M\mathbf{R}_j$  in (3) shows that  $\mathbf{R}^* = \mathbf{I}_3$ . If and only if  ${}^M\mathbf{R}_j = \mathbf{I}_3$  for all  $j = 1, \dots, 4$ ,  $\lambda = 4$ ; otherwise,  $\lambda < 4$ .  $\square$

## 2 Different Structures and force polytope

The first structure is omnidirectional. The second structure has its force polytope (which is scaled in the  $x$ - and  $y$ -axes of  $\{S\}$  by a factor of 4 for better visualization) thinner than that of the third structure. Although the wider force polytope of the third structure indicates a wider range of tilting in hovering, the maximum payload capacity is less than that of the second, indicated by the smaller “height” of the polytope.

| Structure                                                                           | Force polytope                                                                      | Description                                                                                                                         | Characteristics                                                              | Applications                                                                                                                      |
|-------------------------------------------------------------------------------------|-------------------------------------------------------------------------------------|-------------------------------------------------------------------------------------------------------------------------------------|------------------------------------------------------------------------------|-----------------------------------------------------------------------------------------------------------------------------------|
|    |    | Omnidirectional structure of 2 $T$ -modules with $\eta_1 = \frac{\pi}{4}$ and $\eta_2 = -\frac{\pi}{4}$ connected bottom to bottom. | Ability to hover at an arbitrary attitude with half of the rotors idling.    | <ul style="list-style-type: none"> <li>• 3-D environment imaging.</li> <li>• Maneuvering in cluttered environment.</li> </ul>     |
|    |    | Fully-actuated $2 \times 2$ structure composed of 4 $R$ -modules, used for experiment 3.                                            | Ability to generate strong lift force while remaining fully-actuated.        | <ul style="list-style-type: none"> <li>• Transporting heavy packages.</li> <li>• Base station for coverage control.</li> </ul>    |
|   |   | Fully-actuated $2 \times 2$ structure of 4 $T$ -modules, used for experiment 4, 5, and 6.                                           | Ability to achieve higher tilt angles when hovering.                         | <ul style="list-style-type: none"> <li>• Transporting delicate objects with attitude constraints.</li> </ul>                      |
|  |  | Fully-actuated $5 \times 1$ structure of 5 $T$ -modules.                                                                            | Ability to accelerate in one direction faster than in another.               | <ul style="list-style-type: none"> <li>• Navigating through narrow spaces.</li> <li>• Fixed-direction transportation.</li> </ul>  |
|  |  | Fully-actuated plus-shape structure composed of 3 $T$ -module of 2 types and 2 $R$ -modules.                                        | Ability to move in cluttered environments such as a half-collapsed building. | <ul style="list-style-type: none"> <li>• Exploring cluttered environment.</li> <li>• Traversing wind-disturbed fields.</li> </ul> |

**Table 1:** Force polytopes of the corresponding H-ModQuad structures. The second and third structures are the fully-actuated structures used for the real-robot experiments.

### 3 Module components

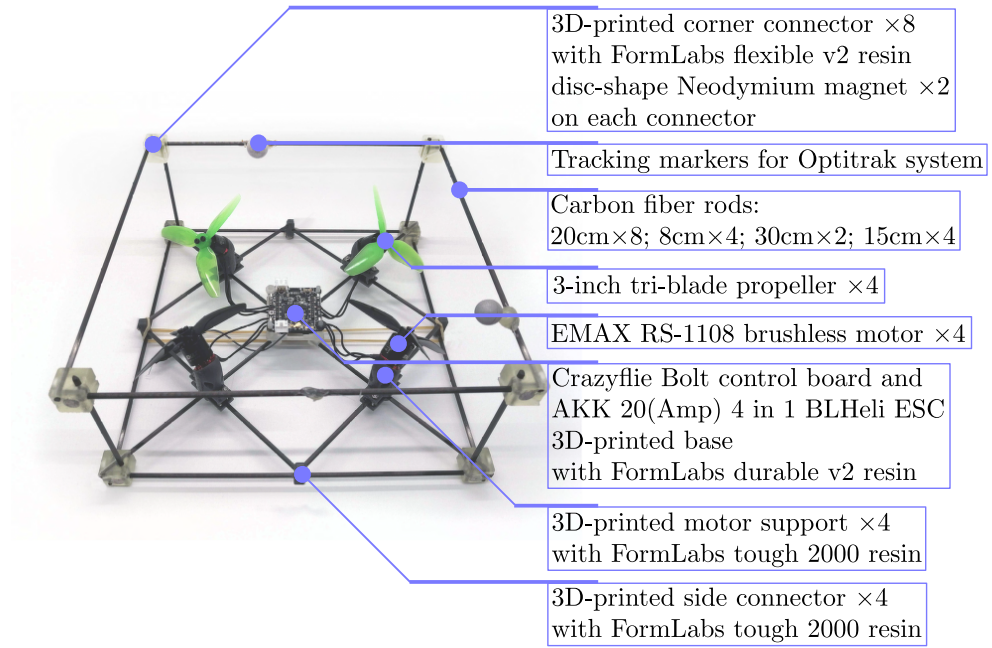

**Fig. 1:** The main components of an H-ModQuad prototype, exemplified by a *T*-module.



## 4 Experiment state plot

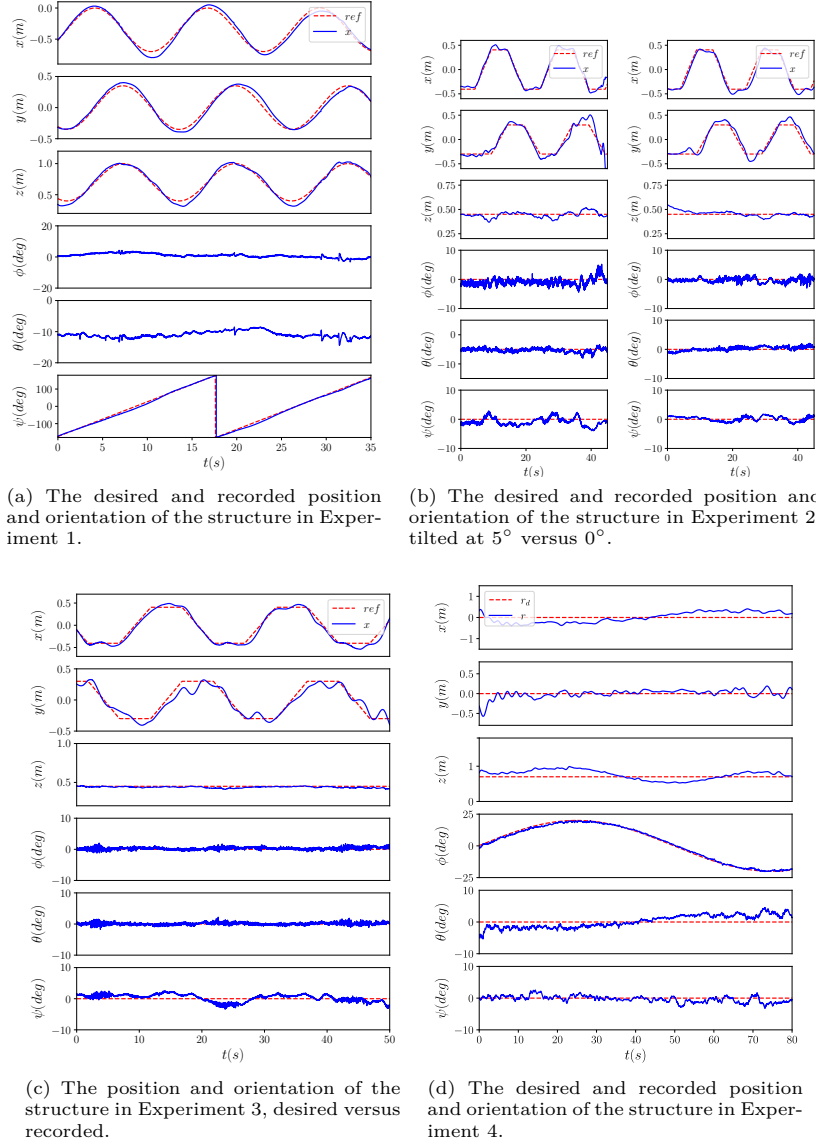

**Fig. 2:** The trajectory tracking plots of Experiments 1 - 4.

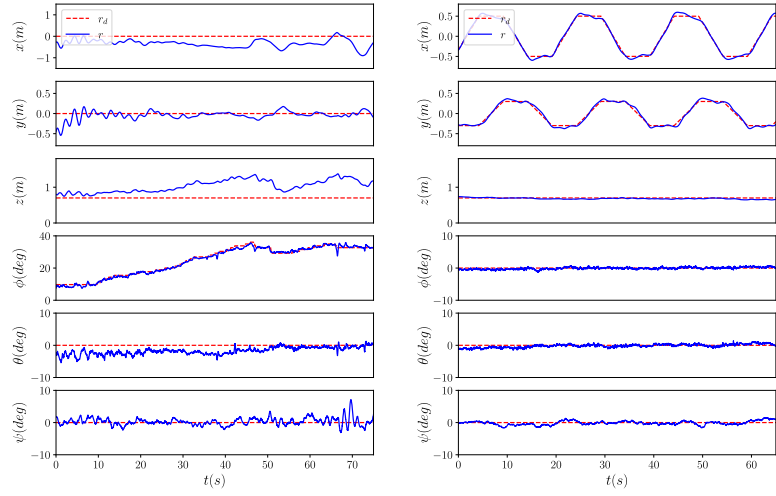

(a) The desired and recorded position and orientation of the structure in Experiment 5.

(b) The desired and recorded position and orientation of the structure in Experiment 6.

**Fig. 3:** The trajectory tracking plots of Experiments 5 and 6.
